# Supplementary material for: ATR‐IR Spectroscopy Application to Diagnostic Screening of Advanced Endometriosis
Source: Hindawi journal article supplement (doi:10.1155/2022/4777434), 2022-01-01
Supplement: f1 [file 4777434.f1.pdf]

## ATR-IR spectroscopy application to diagnostic screening of advanced endometriosis

Izabela Kokot<sup>1\*</sup>, Sylwester Mazurek<sup>2\*</sup>, Agnieszka Piwowar<sup>3</sup>, Roman Szostak<sup>2</sup>, Marcin Jędryka<sup>4,5</sup>, Ewa Maria Kratz<sup>1</sup>

<sup>1</sup> Department of Laboratory Diagnostics, Division of Laboratory Diagnostics, Faculty of Pharmacy, Wrocław Medical University, Borowska Street 211A, 50-556 Wrocław, Poland

<sup>2</sup> Faculty of Chemistry, University of Wrocław, F. Joliot-Curie 14, 50-383 Wrocław, Poland

<sup>3</sup> Department of Toxicology, Faculty of Pharmacy, Wrocław Medical University, Borowska Street 211, 50-556 Wrocław, Poland

<sup>4</sup> Department of Oncology, Gynecological Oncology Clinic, Faculty of Medicine, Hirszfeld Square 12, 53-413 Wrocław Medical University, Wrocław, Poland

<sup>5</sup> Department of Oncological Gynecology, Wrocław Comprehensive Cancer Center, Hirszfeld Square 12, 53-413 Wrocław, Poland

Correspondence to: Izabela Kokot: [izabela.kokot@umed.wroc.pl](mailto:izabela.kokot@umed.wroc.pl) or Sylwester Mazurek: [sylwester.mazurek@chem.uni.wroc.pl](mailto:sylwester.mazurek@chem.uni.wroc.pl)

### Supporting Informations

List of content:

**Table S1.** Serum parameters

**Table S2.** Confusion matrix for PLS-DA models after iPLS variable selection

**Fig. S1.** PCA scores based on biochemical parameters of serum samples

**Fig. S2.** PCA of biochemical serum parameters obtained with GLSW pre-treatment

**Fig. S3.** VIP scores for PLS-DA modeling of biochemical data of serum samples

**Fig. S4.** PLS-DA of serum biochemical parameters

**Fig. S5.** Average FTIR ATR spectra of serum samples for three studied groups and second derivatives of spectra

**Fig. S6.** ATR difference spectra of average serum samples with +/-SD of absorbance

**Fig. S7.** IR spectra of serum sample dried on an ATR crystal collected in 10-min. intervals

**Fig. S8.** PCA for ATR spectra of serum sample during drying and thin film formation

**Fig. S9.** PCA scores for ATR spectra of serum samples obtained based on 700-1450 cm<sup>-1</sup> spectral range

**Fig. S10.** PLS-DA scores for ATR spectra of serum samples obtained based on 700-1450 cm<sup>-1</sup> spectral range

**Fig. S11.** VIP scores of PLS-DA and iPLS variable selection for ATR data in the 700-1450 cm<sup>-1</sup> spectral range

**Fig. S12.** PLS-DA of ATR spectra of sera - ROC plots for all three groups of samples and calibration/cross-validation errors for the model constructed applying variables selected by iPLS

**Fig. S13.** ATR inputs selected by PCA for fused data modeling

**Fig. S14.** Errors of classification for PLS-DA model constructed on the basis of fused data

**Table S1.** Serum parameters

|                      | <b>Endometriosis</b><br><i>n</i> = 29 | <b>Non-<br/>endometriosis</b><br><i>n</i> = 24 | <b>Control</b><br><i>n</i> = 18 |
|----------------------|---------------------------------------|------------------------------------------------|---------------------------------|
|                      | <b>Mean ± SD</b>                      | <b>Mean ± SD</b>                               | <b>Mean ± SD</b>                |
| Estradiol [pg/mL]    | 83.63 ± 83.93                         | 96.59 ± 81.74                                  | 77.52 ± 65.17                   |
| PRL [ng/mL]          | 29.01 ± 18.71                         | 27.02 ± 18.62                                  | 12.84 ± 4.86                    |
| CA 125 [U/mL]        | 113.41 ± 129.42                       | 23.64 ± 17.39                                  | 14.28 ± 7.40                    |
| IgG [mg/dL]          | 1065.46 ± 286.73                      | 1078.22 ± 298.25                               | 1237.28 ± 215.91                |
| TAS [mmol/L]         | 1.50 ± 0.18                           | 1.61 ± 0.27                                    | 1.60 ± 0.22                     |
| hsCRP [mg/L]         | 14.29 ± 19.45                         | 13.88 ± 19.96                                  | 0.96 ± 1.19                     |
| Glucose [mg/dL]      | 77.79 ± 25.97                         | 69.79 ± 17.91                                  | 86.24 ± 10.63                   |
| Total protein [g/dL] | 6.89 ± 1.32                           | 6.61 ± 0.68                                    | 6.77 ± 0.38                     |
| Albumin [g/dL]       | 4.36 ± 0.64                           | 4.13 ± 0.32                                    | 4.26 ± 0.19                     |
| T-BIL [mg/dL]        | 0.54 ± 0.37                           | 0.65 ± 0.45                                    | 0.59 ± 0.24                     |
| Calcium [mg/dL]      | 9.62 ± 1.15                           | 9.35 ± 0.49                                    | 9.29 ± 0.25                     |
| Magnesium [mg/dL]    | 2.44 ± 0.37                           | 2.47 ± 0.18                                    | 2.22 ± 0.14                     |
| Iron [µg/dL]         | 104.10 ± 60.76                        | 107.21 ± 74.27                                 | 105.89 ± 38.24                  |
| T-CHOL [mg/dL]       | 197.83 ± 48.31                        | 181.50 ± 28.66                                 | 190.67 ± 36.63                  |
| HDL [mg/dL]          | 53.79 ± 12.84                         | 53.96 ± 10.38                                  | 55.44 ± 12.52                   |
| TG [mg/dL]           | 105.62 ± 44.41                        | 111.79 ± 78.38                                 | 102.06 ± 42.21                  |
| Uric Acid [mg/dL]    | 4.78 ± 1.02                           | 4.85 ± 1.38                                    | 4.72 ± 0.95                     |
| LDL [mg/dL]          | 122.86 ± 37.35                        | 105.08 ± 23.54                                 | 114.72 ± 30.54                  |
| hsIL-1β [pg/ml]      | 0.57 ± 0.39                           | 0.56 ± 0.46                                    | 0.27 ± 0.26                     |
| IL-6 [pg/ml]         | 19.33 ± 43.69                         | 18.05 ± 34.09                                  | 1.47 ± 1.48                     |
| FRAP [mmol/L]        | 1.11 ± 0.26                           | 1.18 ± 0.30                                    | 0.95 ± 0.22                     |
| AOPP [µmol/L]        | 235.16 ± 150.41                       | 181.78 ± 156.00                                | 105.16 ± 49.24                  |
| YKL-40 [ng/ml]       | 685.22 ± 1246.58                      | 403.29 ± 934.76                                | 104.12 ± 154.07                 |
| SIRT3 [ng/mL]        | 12.32 ± 7.59                          | 11.11 ± 6.80                                   | 11.22 ± 6.03                    |
| SIRT5 [ng/mL]        | 8.21 ± 4.41                           | 9.61 ± 5.72                                    | 8.49 ± 6.04                     |
| SIRT6 [ng/mL]        | 12.32 ± 16.84                         | 15.88 ± 18.74                                  | 8.45 ± 10.95                    |
| Telomerase [ng/mL]   | 1.61 ± 1.88                           | 1.82 ± 2.96                                    | 0.39 ± 0.52                     |

AOPP — advanced protein oxidation products; CA 125 — carcinoma antigen 125; FRAP — ferric reducing antioxidant power; HDL — high-density lipoprotein cholesterol; hsCRP — high sensitive C-reactive protein; hsIL-1β — high sensitive interleukin 1β; IgG — immunoglobulin G; IL-6 — interleukin 6; LDL — low-density lipoprotein cholesterol; PRL — prolactin; SIRT3 — sirtuin 3; SIRT5 — sirtuin 5; SIRT6 — sirtuin 6; TAS — total antioxidant status; TG — triglycerides; T-BIL — total bilirubin; T-CHOL — total cholesterol; YKL-40 — chitinase-3-like protein 1.

**Table S2.** Confusion matrix for PLS-DA models after iPLS variable selection

| Data set               |                 | Calibration |          |           | Cross-validation |          |           |
|------------------------|-----------------|-------------|----------|-----------|------------------|----------|-----------|
|                        |                 | Actual C    | Actual E | Actual NE | Actual C         | Actual E | Actual NE |
| Biochemical parameters | Predicted as C  | 17          | 3        | 2         | 17               | 3        | 3         |
|                        | Predicted as E  | 0           | 21       | 0         | 0                | 20       | 2         |
|                        | Predicted as NE | 1           | 2        | 18        | 1                | 3        | 15        |
| ATR spectra            | Predicted as C  | 17          | 0        | 1         | 15               | 1        | 1         |
|                        | Predicted as E  | 0           | 28       | 0         | 1                | 26       | 1         |
|                        | Predicted as NE | 0           | 1        | 23        | 1                | 2        | 22        |
| Fused data             | Predicted as C  | 18          | 1        | 1         | 18               | 2        | 1         |
|                        | Predicted as E  | 0           | 25       | 1         | 0                | 24       | 3         |
|                        | Predicted as NE | 0           | 3        | 22        | 0                | 3        | 20        |

E – endometriosis, NE – non-endometriosis, C – control group of healthy women.

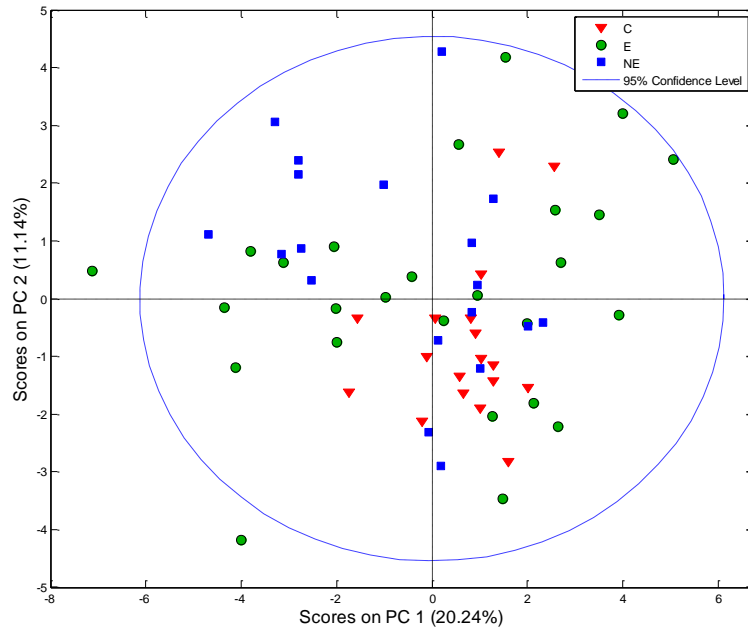

**Figure S1.** PCA scores based on biochemical parameters of serum samples. E – endometriosis, NE – non-endometriosis, C – control group of healthy women.

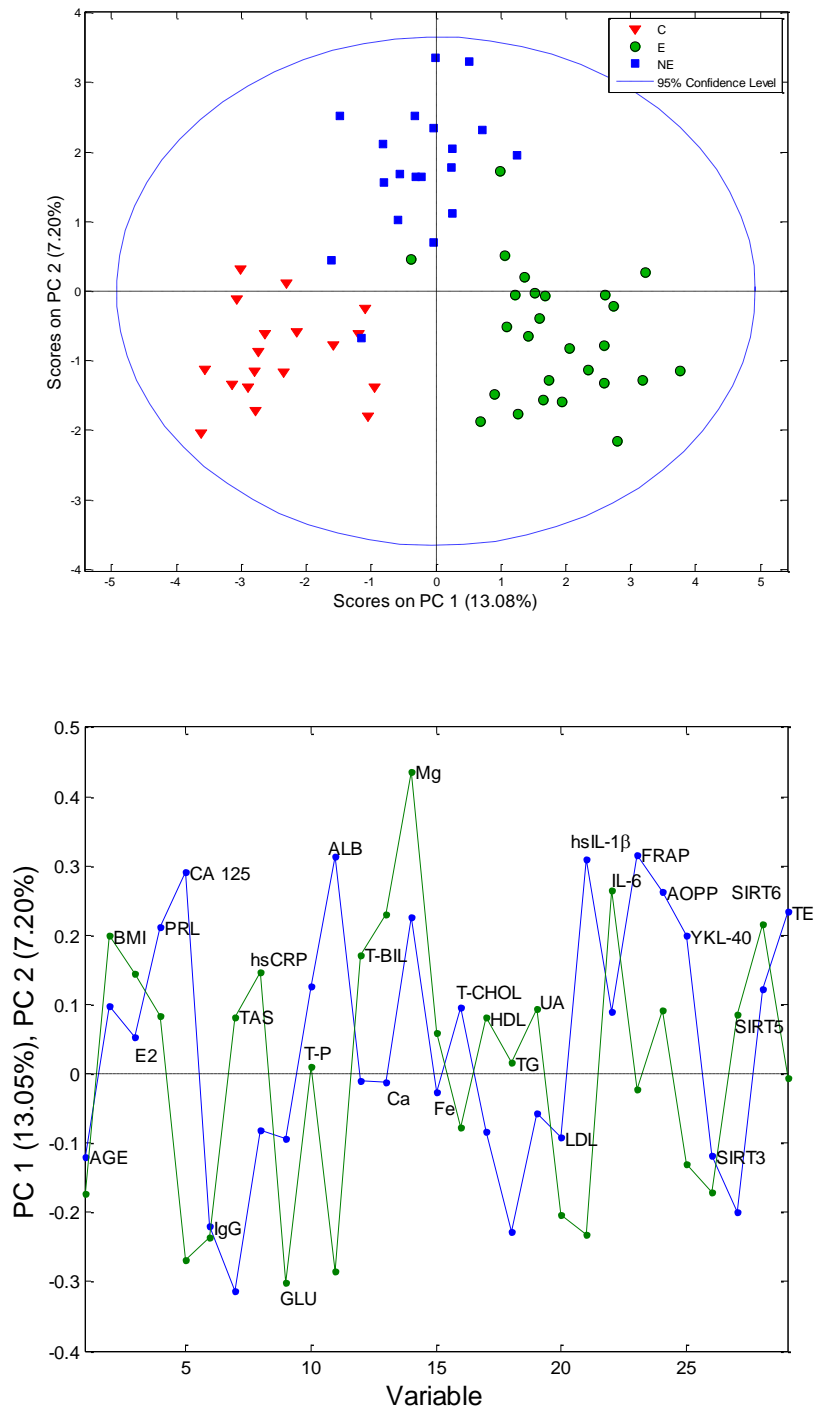

**Figure S2.** PCA of biochemical serum parameters obtained with GLSW pre-treatment; scores (top) and loadings (bottom). E – endometriosis, NE – non-endometriosis, C – control group of healthy women. ALB — albumin; AOPP — advanced protein oxidation products; BMI — body mass index; Ca — calcium; CA 125 — carcinoma antigen 125; E2 — estradiol; Fe — iron; FRAP — ferric reducing antioxidant power; GLSW — general least squares weighting; GLU — glucose; HDL — high-density lipoprotein cholesterol; hsCRP — high sensitive C-reactive protein; hslL-1 $\beta$  — high sensitive interleukin 1 $\beta$ ; IgG — immunoglobulin G; IL-6 — interleukin 6; LDL — low-density lipoprotein cholesterol; Mg — magnesium; PRL — prolactin; SIRT3 — sirtuin 3; SIRT5 — sirtuin 5; SIRT6 — sirtuin 6; TAS — total antioxidant status; TE — telomerase; TG — triglycerides; T-P — total protein; T-BIL — total bilirubin; T-CHOL — total cholesterol; UA — uric acid; YKL-40 — chitinase-3-like protein 1.

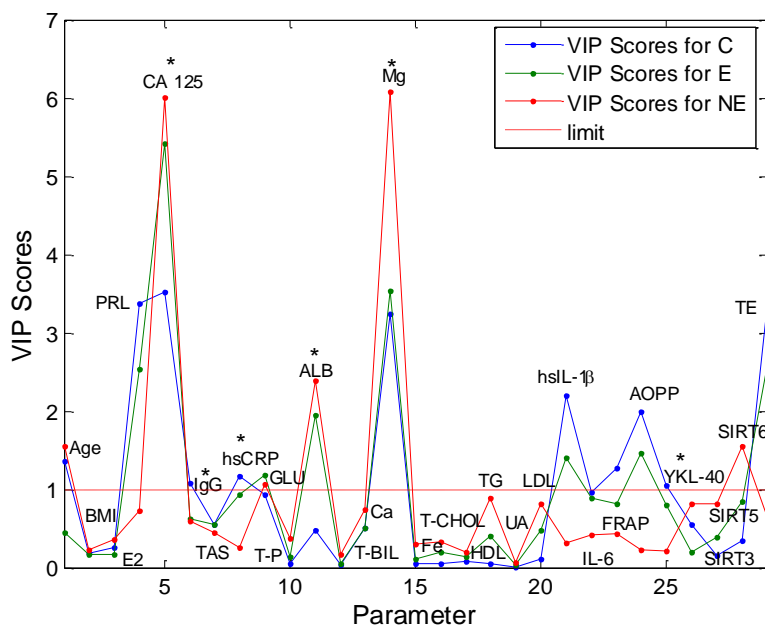

**Figure S3.** VIP scores for PLS-DA modeling of biochemical data of serum samples; \* indicates variables selected by the iPLS. E – endometriosis, NE – non-endometriosis, C – control group of healthy women. ALB – albumin; AOPP – advanced protein oxidation products; BMI – body mass index; Ca – calcium; CA 125 – carcinoma antigen 125; E2 – estradiol; Fe – iron; FRAP – ferric reducing antioxidant power; GLU – glucose; HDL – high-density lipoprotein cholesterol; hsCRP – high sensitive C-reactive protein; hslL-1 $\beta$  – high sensitive interleukin 1 $\beta$ ; IgG – immunoglobulin G; IL-6 – interleukin 6; LDL – low-density lipoprotein cholesterol; Mg – magnesium; PRL – prolactin; SIRT3 – sirtuin 3; SIRT5 – sirtuin 5; SIRT6 – sirtuin 6; TAS – total antioxidant status; TE – telomerase; TG – triglycerides; T-P – total protein; T-BIL – total bilirubin; T-CHOL – total cholesterol; UA – uric acid; YKL-40 – Chitinase-3-like protein 1.

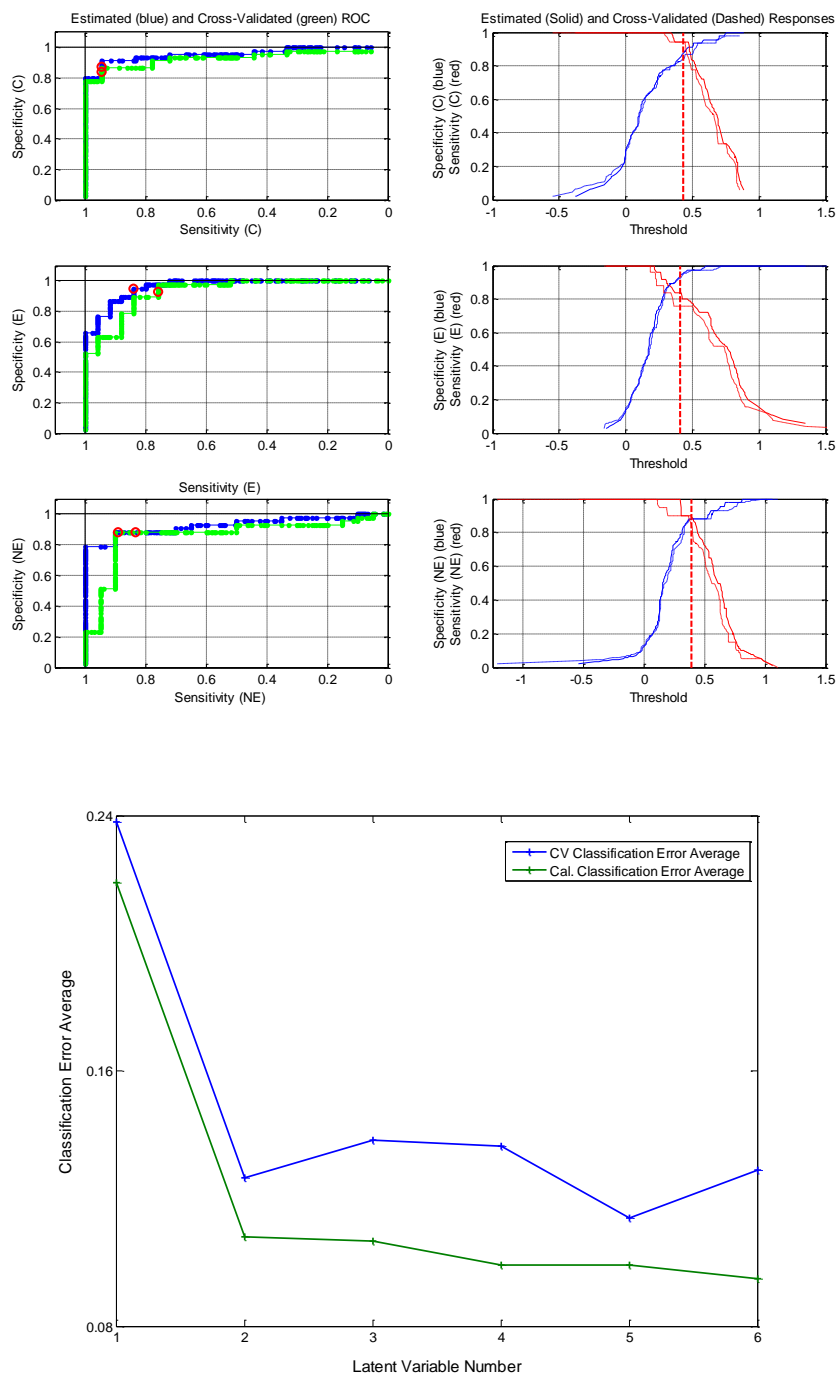

**Figure S4.** PLS-DA of serum biochemical parameters; ROC plots for three groups of samples (top); calibration and cross-validation errors for the model constructed applying variables selected by iPLS (bottom). E – endometriosis, NE – non-endometriosis, C – control group of healthy women.

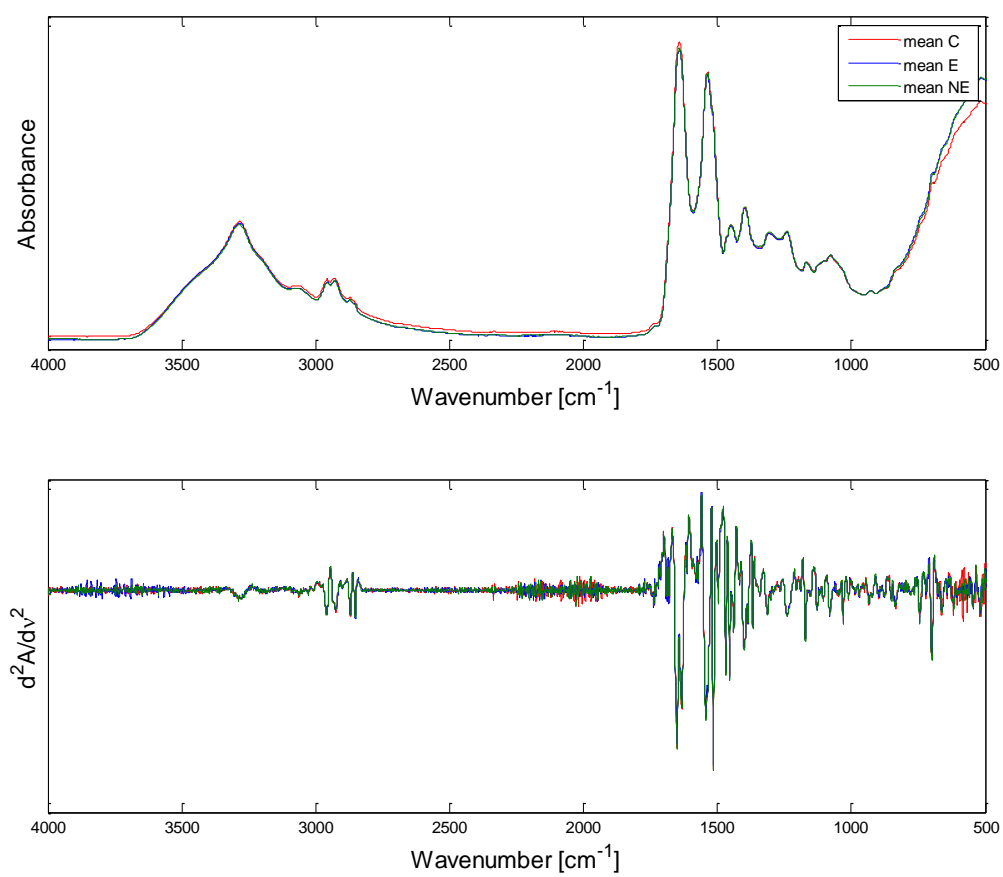

**Figure S5.** Average FTIR ATR spectra of serum samples for three studied groups (top) and second derivatives of spectra (bottom). E – endometriosis, NE – non-endometriosis, C – control group of healthy women.



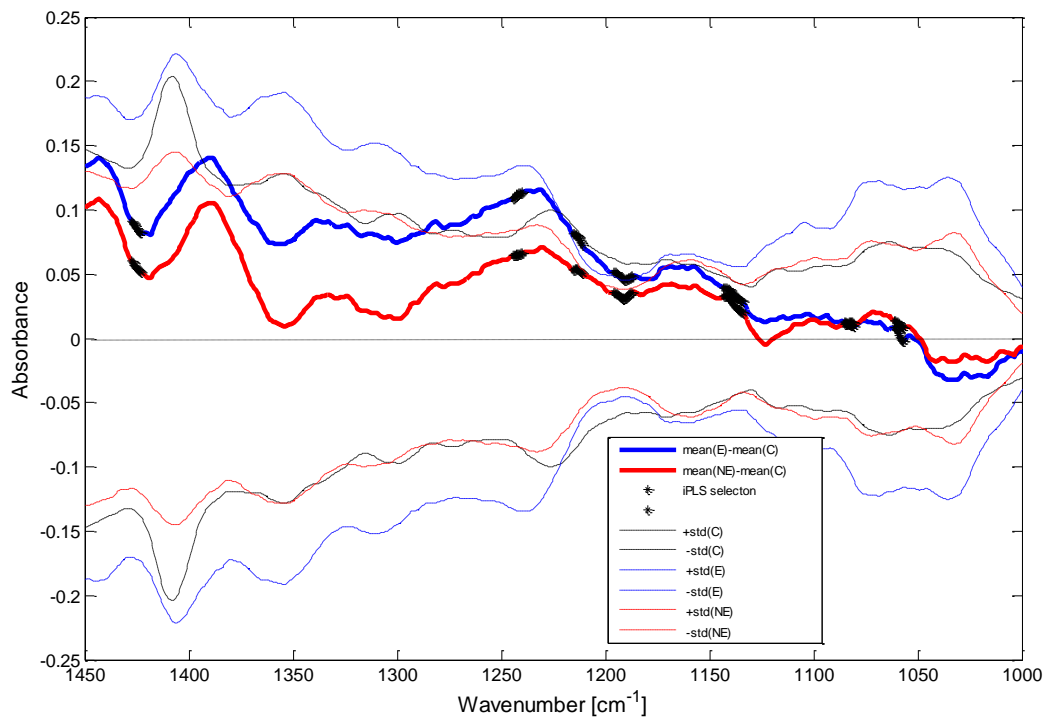

**Figure S6.** Difference spectra between the mean of sera samples with  $\pm$  standard deviation of signals' intensities. E – endometriosis, NE – non-endometriosis, C – control group of healthy women.

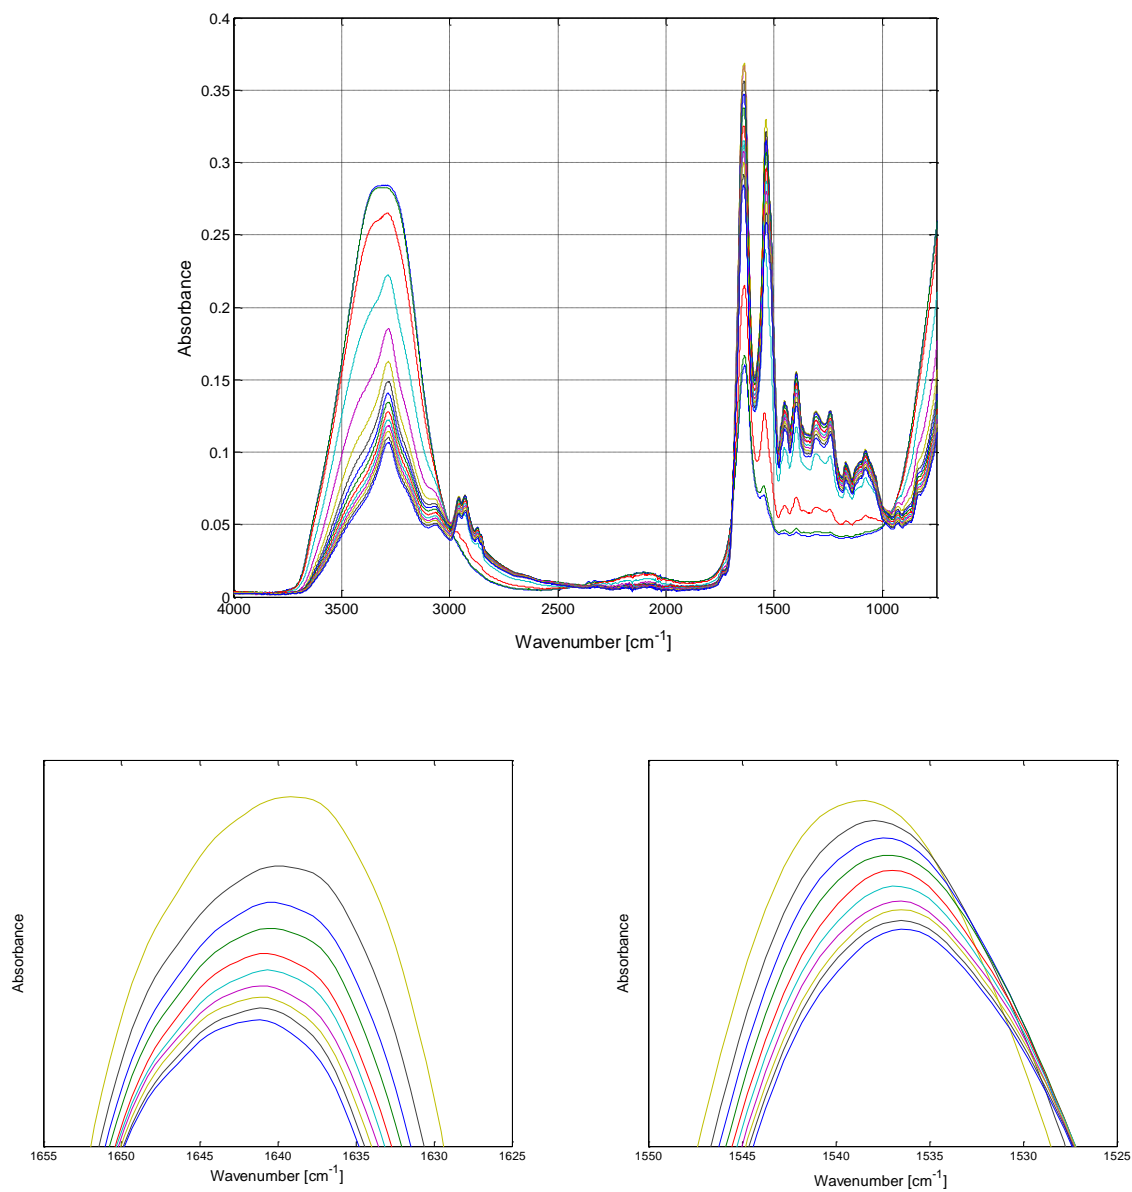

**Figure S7.** IR spectra of serum sample dried on an ATR crystal collected in 10-min. intervals (top); change of the peak position of the Amide I (left) and Amide II (right) bands during thin film formation (bottom). E – endometriosis, NE – non-endometriosis, C – control group of healthy women.

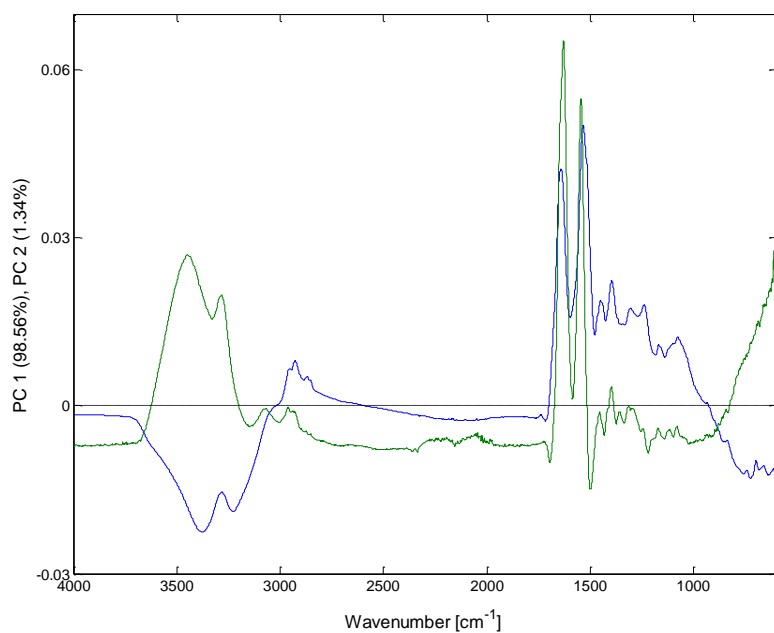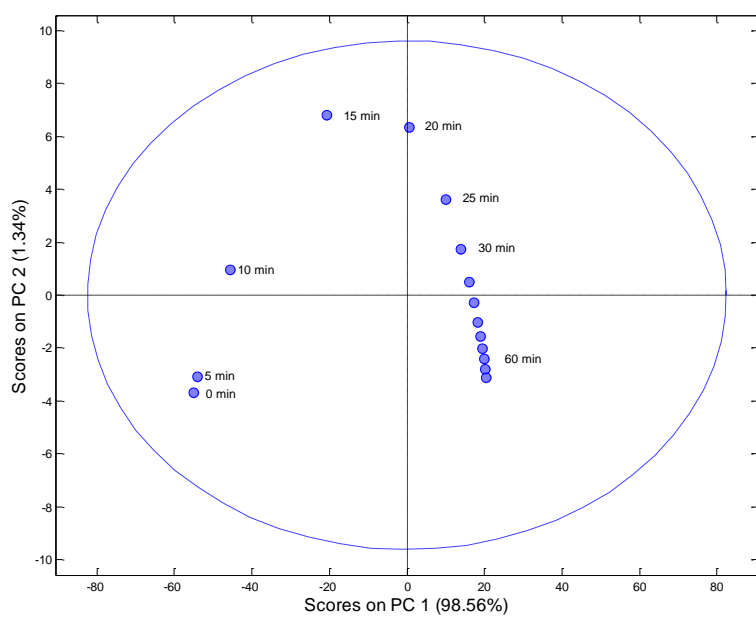

**Figure S8.** PCA for ATR spectra of serum sample during drying and thin film formation: loadings of two first principal components (top) and scores plots (bottom).

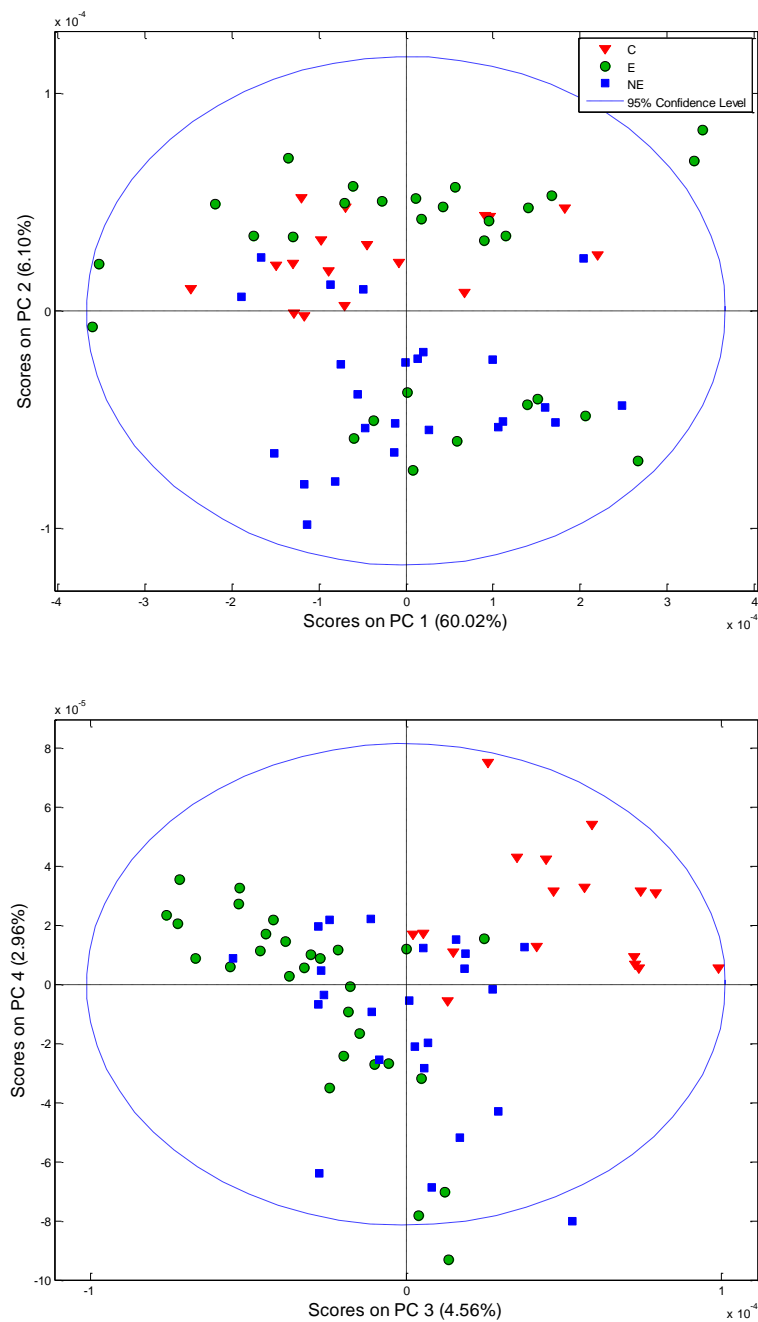

**Figure S9.** PCA scores for ATR spectra of serum samples obtained based on  $700\text{-}1450\text{ cm}^{-1}$  spectral range; loadings of two first principal components (top) and third and fourth principal components (bottom). E – endometriosis, NE – non-endometriosis, C – control group of healthy women.

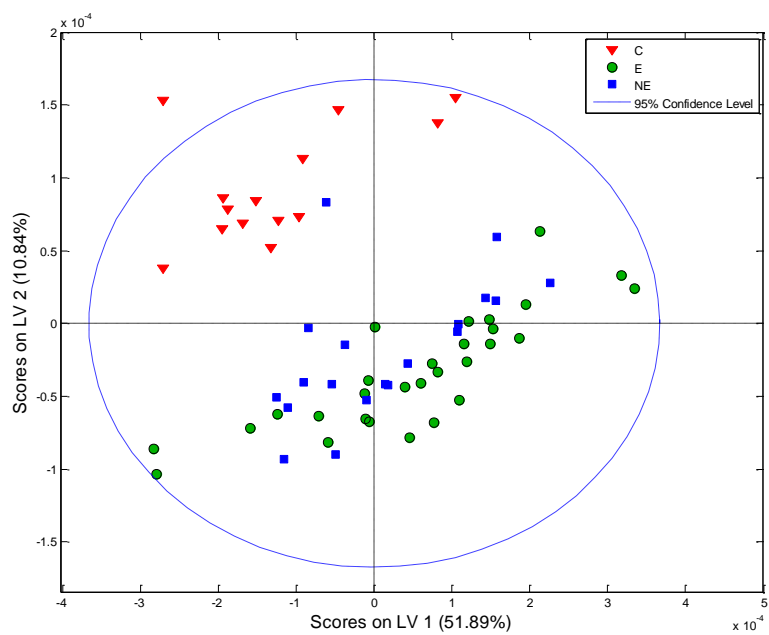

**Figure S10.** PLS-DA scores for ATR spectra of serum samples obtained based on 700-1450  $\text{cm}^{-1}$  spectral range. E – endometriosis, NE – non-endometriosis, C – control group of healthy women.

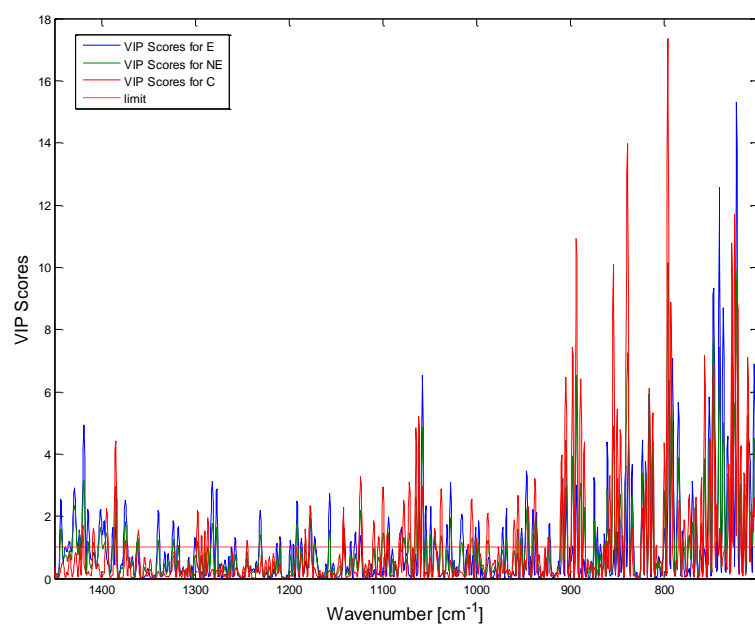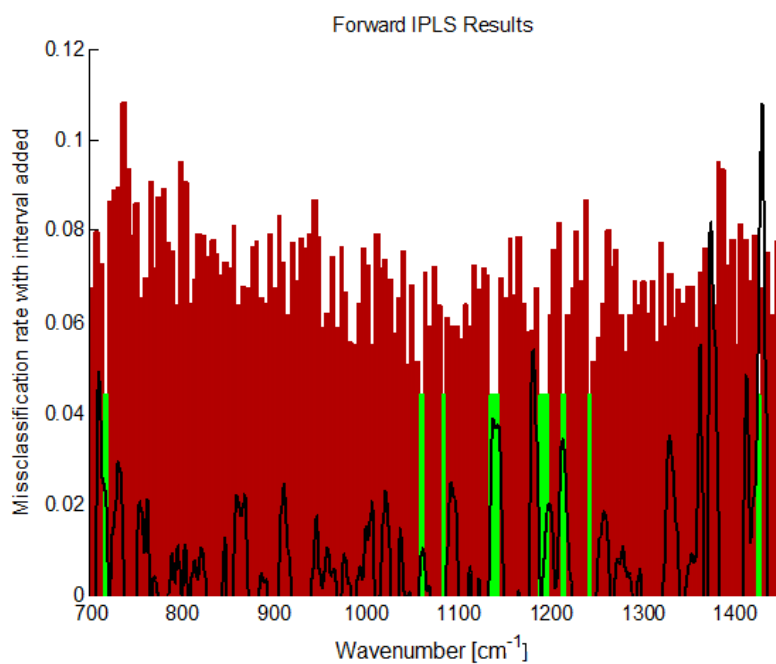

**Figure S11.** VIP scores of PLS-DA (top) and iPLS variable selection (bottom) for ATR data in the 700-1450 cm<sup>-1</sup> spectral range. E – endometriosis, NE – non-endometriosis, C – control group of healthy women.

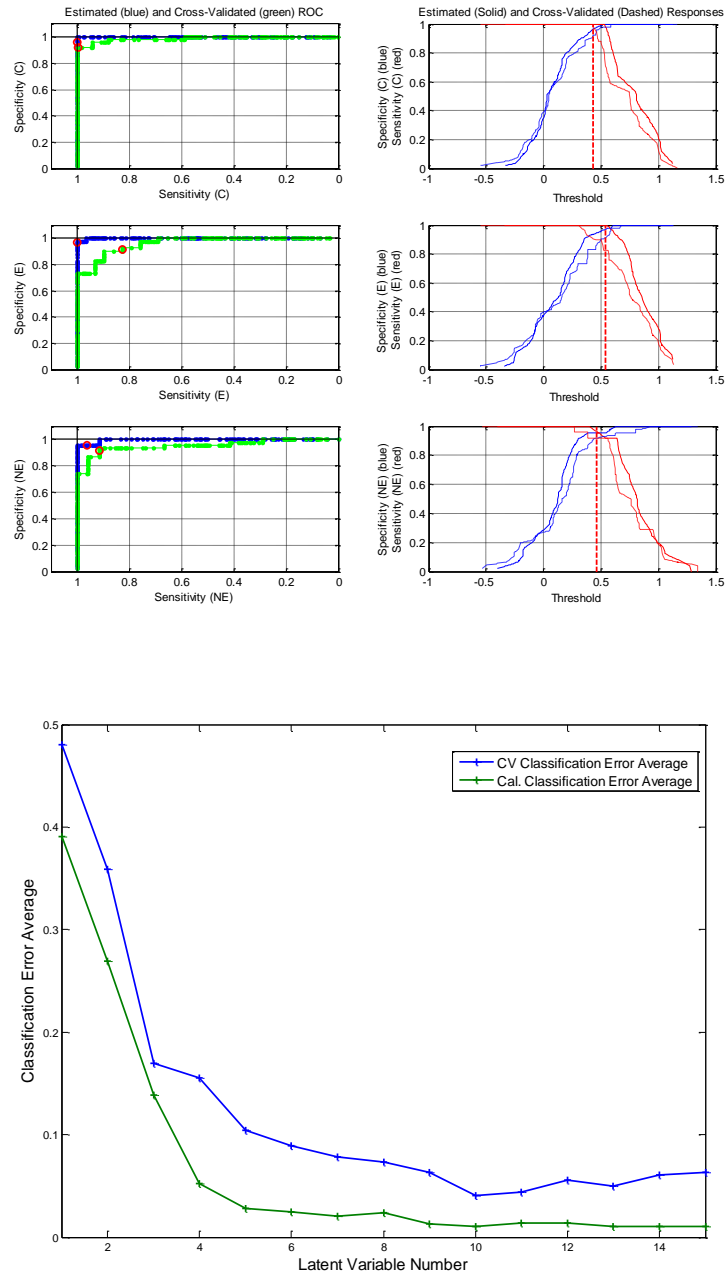

**Figure S12.** PLS-DA of ATR spectra of sera - ROC plots for all three groups of samples (top) and calibration/cross-validation errors for the model constructed applying variables selected by iPLS (bottom). E – endometriosis, NE – non-endometriosis, C – control group of healthy women.

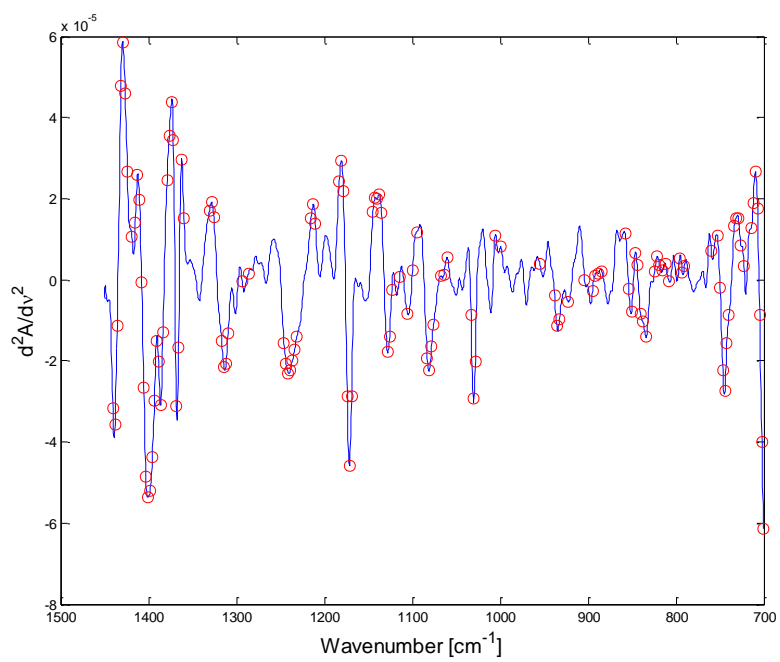

**Figure S13.** ATR inputs selected by PCA for fused data modeling.



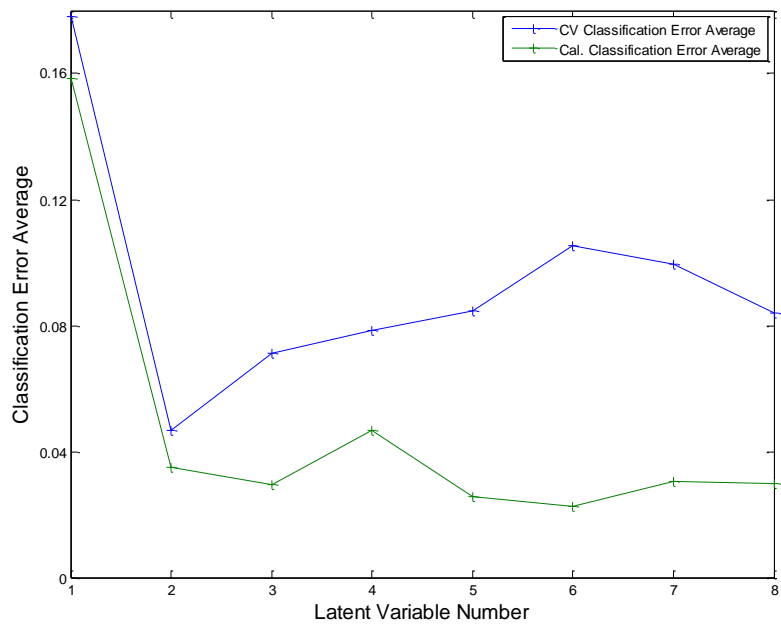

**Figure S14.** Errors of classification for PLS-DA model constructed on the basis of fused data.
